# Supplementary material for: Treatment with G-CSF reduces acute myeloid leukemia blast viability in the presence of bone marrow stroma
Source: Springer Nature journal article supplement (doi:10.1186/s12935-015-0272-3), 2015-12-01

Nomdedeu et al. Supplementary Figure 1

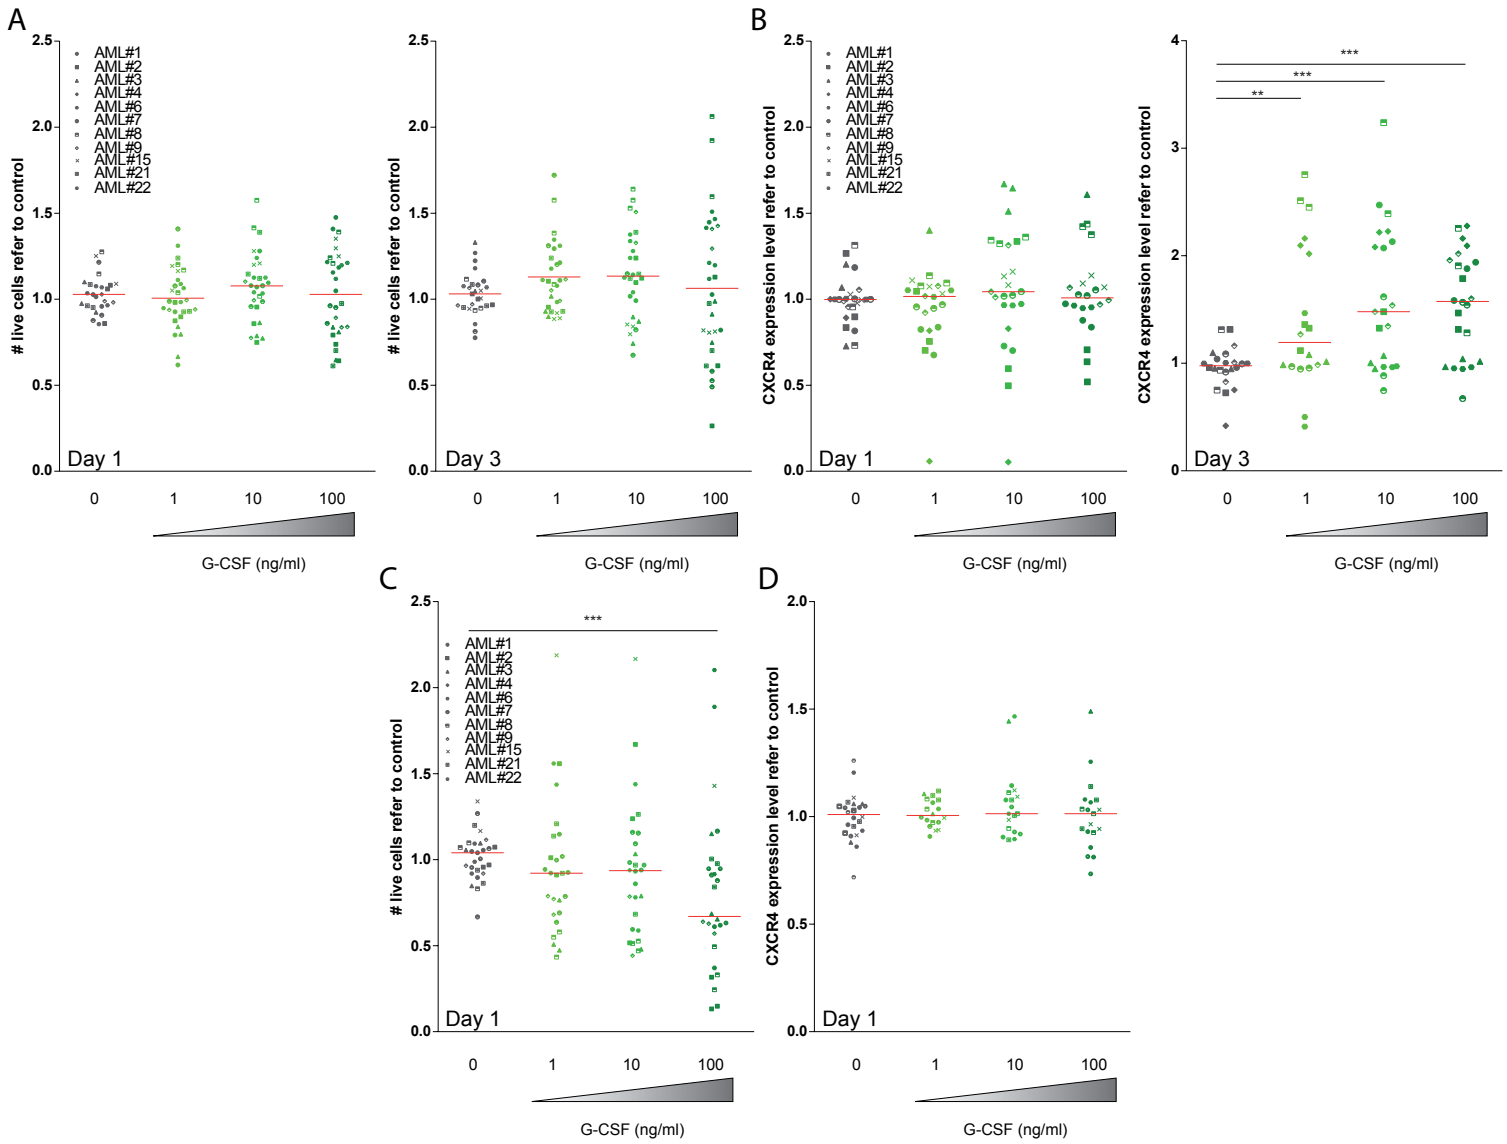

Supplement: MOESM1 [file 9760862]
